## RETRACTION

# Retraction: Eya1 controls cell polarity, spindle orientation, cell fate and Notch signaling in distal embryonic lung epithelium.

Development doi: 10.1242/dev.058479

**Ahmed HK El-Hashash, Gianluca Turcatel, Denise Al Alam, Sue Buckley, Hiroshi Tokumitsu, Saverio Bellusci and David Warburton**

The journal is retracting ‘Eya1 controls cell polarity, spindle orientation, cell fate and Notch signalling in distal embryonic lung epithelium’ by Ahmed HK El-Hashash, Gianluca Turcatel, Denise Al Alam, Sue Buckley, Hiroshi Tokumitsu, Saverio Bellusci and David Warburton (2011). *Development* **138**, 1395-1407 (doi: 10.1242/dev.058479).

This Retraction updates and replaces the Publisher’s Note (doi: 10.1242/dev.148718) relating to the above-referenced article. Development is retracting this article at the request of the institution. The authors have been notified of this request.

Unfortunately, the journal has no further information on the reasons behind this retraction.

## PUBLISHER'S NOTE

# Publisher's Note: Eya1 controls cell polarity, spindle orientation, cell fate and Notch signaling in distal embryonic lung epithelium by El-Hashash et al. Development doi:10.1242/dev.058479

### Olivier Pourquié

Editor in Chief, Development (dev@biologists.com)

This Publisher's Note relates to the article 'Eya1 controls cell polarity, spindle orientation, cell fate and Notch signaling in distal embryonic lung epithelium' by El-Hashash et al. (doi:10.1242/dev.058479).

We have recently been made aware that several of the panels in Fig. 7 of this article may also appear in a paper from some of the same authors published in *Developmental Biology* (El-Hashash et al., 2011). We have contacted the authors to alert them to this alleged duplication to enable them to conduct further investigation. We are publishing this Note to inform readers of this situation.

This course of action follows the advice set out by COPE (The Committee on Publication Ethics), of which Development is a member.

### Reference

El-Hashash, A. H., Al Alam, D., Turcatel, G., Bellusci, S. and Warburton, D. (2011). Eyes absent 1 (Eya1) is a critical coordinator of epithelial, mesenchymal and vascular morphogenesis in the mammalian lung. *Dev. Biol.* **350**, 112-126.

# Eya1 controls cell polarity, spindle orientation, cell fate and Notch signaling in distal embryonic lung epithelium

Ahmed HK El-Hashash<sup>1,\*</sup>, Gianluca Turcatel<sup>1</sup>, Denise Al Alam<sup>1</sup>, Sue Buckley<sup>1</sup>, Hiroshi Iwamitsu<sup>2</sup>, Saverio Bellusci<sup>1</sup> and David Warburton<sup>1,\*</sup>

## SUMMARY

Cell polarity, mitotic spindle orientation and asymmetric division play a crucial role in the self-renewal/differentiation of epithelial cells, yet little is known about these processes and the molecular programs that control them in embryonic lung distal epithelium. Herein, we provide the first evidence that embryonic lung distal epithelium is polarized with characteristic perpendicular cell divisions. Consistent with these findings, spindle orientation-regulatory proteins Insc, LGN (Gpsm2) and NuMA, and the cell fate determinant Numb are asymmetrically localized in embryonic lung distal epithelium. Interfering with the function of these proteins in vitro randomizes spindle orientation and changes cell fate. We further show that Eya1 protein regulates cell polarity, spindle orientation and the localization of Numb, which inhibits Notch signaling. Hence, Eya1 promotes both perpendicular division as well as Numb asymmetric segregation to one daughter in mitotic distal lung epithelium, probably by controlling aPKC $\zeta$  phosphorylation. Thus, epithelial cell polarity and mitotic spindle orientation are defective after interfering with Eya1 function in vivo or in vitro. In addition, in *Eya1*<sup>-/-</sup> lungs, perpendicular division is not maintained and Numb is segregated to both daughter cells in mitotic epithelial cells, leading to inactivation of Notch signaling. As Notch signaling promotes progenitor cell identity at the expense of differentiated cell phenotypes, we test whether genetic activation of Notch could rescue the *Eya1*<sup>-/-</sup> lung phenotype, which is characterized by loss of epithelial progenitors, increased epithelial differentiation but reduced branching. Indeed, genetic activation of Notch partially rescues *Eya1*<sup>-/-</sup> lung epithelial defects. These findings uncover novel functions for Eya1 as a crucial regulator of the complex behavior of distal embryonic lung epithelium.

**KEY WORDS:** Embryonic lung, Polarity, Eya1, Progenitor cells, Numb, Notch, Spindle orientation, Mouse

## INTRODUCTION

The correct functioning of lung epithelium is essential to life. Mammalian lung development begins when two primary buds consisting of an inner epithelial layer surrounded by mesenchyme arise from the laryngotracheal groove in the ventral foregut. These buds undergo stereotypic rounds of branching and outgrowth to give rise to a tree-like respiratory organ, which contains inherent specialized epithelial cell types organized along the proximo-distal axis (Cardoso, 2000; Warburton et al., 2000; Warburton, 2008; Metzger et al., 2008). In order to function effectively, the distal surface must form a selectively permeable monolayer where cell-cell contact provides important spatial cues that are required to generate cell polarity/communication (Nelson, 2003a; Nelson, 2003b; Boitano et al., 2004).

Cell polarity, the asymmetry in distribution of cellular constituents within a single cell is fundamental to cellular functions and essential for generating cell diversity. Epithelial cells have a characteristic apicobasal polarity, which is necessary for their function as barriers between different extracellular environments (Drubin and Nelson, 1999; Mostov et al., 2000). In epithelial cells, the axis of polarity that will determine the

orientation of the apical-basal cell division plane is defined by the cell fate determinants (CFDs), e.g. Numb and Par proteins. Intrinsic CFDs are asymmetrically localized in dividing cells, and preferentially segregate into one of two sibling daughters in order to mediate asymmetric divisions (Betschinger and Knoblich, 2004). The regulation of spindle orientation is often associated with cell polarity regulation in polarized cells in model organisms. The orientation and positioning of mitotic spindles, which determine the plane of cell division, are tightly regulated in polarized cells such as epithelial cells by intrinsic and extrinsic cues, e.g. cell polarity/geometry. Orientation of mitotic spindle and cell division axis can impact normal physiological processes, including epithelial tissue branching and differentiation (Betschinger and Knoblich, 2004). Despite their likely importance for lung branching, little is known about cell polarity and spindle orientation, and factors/mechanisms that regulate these processes are not well understood in the embryonic lung epithelium.

The Eyes Absent (Eya) proteins possess dual functions as both protein tyrosine phosphatases and transcriptional co-activators, and are involved in cell-fate determination and organ development (Jemc and Rebay, 2007). In mammals, *Eya1-4* and *sine oculis* (*Six*) family genes exhibit synergistic genetic interactions to regulate the development of many organs (Xu et al., 1997a; Xu et al., 1997b; Ford et al., 1998; Coletta et al., 2004). *Eya1*<sup>-/-</sup> and *Six1*<sup>-/-</sup> mouse embryos have defects in the proliferation/survival of the precursor cells of multiple organs, and die at birth (Xu et al., 1999; Xu et al., 2002; Li et al., 2003; Zou et al., 2004). The phosphatase function of Eya1 switches Six1 function from repression to activation in the nucleus, causing transcriptional activation through recruitment of co-activators, which provides a mechanism for activation of specific gene targets, including those regulating precursor cell

<sup>1</sup>Developmental Biology and Regeneration Program, Saban Research Institute, Childrens Hospital Los Angeles, Beck School of Medicine of University of Southern California, 4650 Sunset Boulevard, Los Angeles, CA 90027, USA. <sup>2</sup>Faculty of Medicine, Kagawa University, Takamatsu, Japan.

\* Authors for correspondence (aelhashash@chla.usc.edu; dwardurton@chla.usc.edu)

proliferation/survival during organogenesis (Li et al., 2003). Although *Eya1* transcriptional activity has been extensively characterized, little is known about the targets and functions of its phosphatase activity. Moreover, the physiological requirements for *Eya1* phosphatase activity in the lung epithelium remain obscure.

Herein, we show that *Eya1* is located in the distal epithelium, wherein it regulates cell polarity, spindle orientation, and both aPKC $\zeta$  phosphorylation and Numb segregation. Interfering with *Eya1* function in vivo or in vitro results in defective cell polarity, spindle disorientation and Numb segregation into both daughters, as well as inactivation of Notch signaling in embryonic lung epithelium. Furthermore, activation of Notch signaling in *Eya1*<sup>-/-</sup> distal epithelium partially rescues *Eya1*<sup>-/-</sup> embryonic lung epithelial defects.

## MATERIALS AND METHODS

### Animals

*Eya1*<sup>-/-</sup>, *Spc-rtTA*<sup>+/+</sup> and *Notch1* conditional transgenic (NICD) mice, and their genotyping have been published (Xu et al., 1999; Xu et al., 2002; Perl et al., 2002; Yang et al., 2004). Wild-type littermates were used as controls.

Conditional *NICD;Eya1*<sup>+/+</sup> female mice were generated by intercrossing *Eya1*<sup>+/+</sup> mice with *NICD* mouse strain. *Eya1*<sup>+/+</sup>*Spc-rtTA*<sup>+/+</sup>*tet(o)* *Cre*<sup>+/+</sup> mice were generated by intercrossing *Eya1*<sup>+/+</sup> mice with *Spc-rtTA*<sup>+/+</sup>*tet(o)* *Cre*<sup>+/+</sup> mouse strain previously generated in our laboratory. The resulting *Eya1*<sup>+/+</sup>*Spc-rtTA*<sup>+/+</sup>*tet(o)* *Cre*<sup>+/+</sup> mouse males were intercrossed with *NICD;Eya1*<sup>+/+</sup> females to increase Notch1 activity in the distal epithelium of mutant lungs by generating *NICD;Eya1*<sup>-/-</sup>; *Spc-rtTA*<sup>+/+</sup>*tet(o)* *Cre*<sup>+/+</sup> mutant mice for analysis. Pregnant *NICD;Eya1*<sup>+/+</sup> females were maintained on doxycycline (DOX) containing food (Rodent diet with 0.0625% Doxycycline, Harlan) from E6.5 till sacrifice. Ten compound mutant embryos, which showed more increase of pulmonary Notch1 expression than *Eya1*<sup>-/-</sup> littermates, were generated at expected Mendelian ratios and examined at different stages.

### Phenotype analyses, antibody staining, western blot and immunoprecipitation

Antibody staining on paraffin sections or fixed MLE-15 cells, western blot and immunoprecipitation were performed in triplicates using commercially available antibodies following the manufacturer's instructions and standard protocols as described previously (Tefft et al., 2002; Tefft et al., 2002; Buckley et al., 2005; del Moral et al., 2006a; del Moral et al., 2006b). Briefly, for alveolar type-2 (AEC2) cells, cells were isolated from lavaged lungs using the method of Dobbs et al. (Dobbs et al., 1986), and cultured for 24 hours. The cells were lysed in RIPA buffer, centrifuged, and the supernatant containing ~1 mg protein was pre-cleared by incubation with rabbit IgG and protein A/G agarose, then centrifuged. The cleared supernatant was immunoprecipitated with anti-*Eya1* antibody followed by overnight incubation with protein A/G agarose, then washed before re-suspension in electrophoresis sample buffer. The immunoprecipitate was loaded onto Tris-glycine gel, with a lysates of AEC2 as a positive control, and the non-specific proteins precipitated by rabbit IgG as a negative control. The separated proteins were transferred to Immobilon, and probed overnight with a polarity protein antibody. Fluorescence intensity/protein quantification were produced by densitometric analysis with the Image J software as described (Carraro et al., 2009; Higashigaki et al., 2007).

### Cell culture/transfection and in vitro phosphatase assay

Transfection of epithelial cells with siRNAs or *Eya1* wild-type expression/mutant (D323A) vectors and in vitro phosphatase assays were performed following standard procedures as described previously (Carraro et al., 2009; Cook et al., 2009; Dutil et al., 2009; Dutil et al., 1998). For siRNA experiments, there is no change in means of blank controls or lipofectamine controls, and their data are not presented. The knockdown/overexpression efficiency was analyzed by western blot/immunostaining of targeted protein. In addition, we used an expression vector encoding a VP16 fusion protein, and the transfection efficiency was further monitored by fluorescence staining using anti-VP16 antibody. aPKC $\zeta$  inhibitor was used

at a concentration of 50  $\mu$ mol/l, at which it is effective without displaying cytotoxicity [as reported in other cell systems (Davies et al., 2000; Buteau et al., 2001)].

### Quantification of LGN, NuMA/Insc localization and spindle orientation and statistical analysis

Mitotic cells and polarity orientation were identified by phospho-histone3/pericentrin staining. Quantification of LGN, NuMA/Insc localization and spindle orientation was performed as described previously (Lechler and Fuchs, 2005). Statistical analysis was performed as described previously (Carraro et al., 2009).

## RESULTS

### *Eya1* is expressed in embryonic lung distal epithelium and controls both cell polarity and proper spindle orientation

*Eya1* protein phosphatase is expressed in the nucleus and cytoplasm, where it functions as a cytoplasmic protein phosphatase (Fosterousse et al., 2002; Xiong et al., 2009). Two lines of reasoning have led us to examine *Eya1* functions in distal lung epithelial cell polarity. First, *Eya1* has a polarized (mostly apical) expression pattern in the distal epithelial tips, particularly from E12.5-E13 (Fig. 1A,B,C), similar to polarity proteins Numb/LGN/Insc (Fig. 1E,F; Fig. 2A,G). Second, other members of the protein phosphatase family, e.g. protein phosphatase 2A, are crucial regulators of cell polarity, spindle orientation and cell fate in *Drosophila* neural epithelium (Ogawa et al., 2009; Wang C. et al., 2009). In this study, E14-E14.5 was used as the developmental stage of choice to analyze the behavior of distal epithelium because cell proliferation and expression of progenitor cell markers Sox9, Id2 and N-myc (MycN) (MycN Genome Informatics) are relatively high. In addition, *Eya1*<sup>-/-</sup> early lung development is normal and *Eya1*<sup>-/-</sup> epithelial lung phenotype is evident at E14-E14.5, as discussed later.

The polarity proteins LGN (Gpsm2 – Mouse Genome Informatics), NuMA (Numa1 – Mouse Genome Informatics) and Insc regulate mitotic spindle orientation during epithelial morphogenesis (Siller and Doe, 2009; Zheng et al., 2010). In epithelial cells in interphase or undergoing lateral/planar divisions have a diffuse or basolateral localization of LGN, whereas cells undergoing perpendicular (i.e. apical-basal) divisions have LGN only at the apical cell side (Lechler and Fuchs, 2005). In wild-type lungs, an apical staining of anti-LGN labeling was seen at the cortex of most mitotic cells of distal epithelial tips (Fig. 2A,A',J), which are highly mitotic (Bishop, 2004).

In *Eya1*<sup>-/-</sup> distal epithelial tips, no apparent changes in LGN, NuMA, Par3 and Insc expression levels were observed (Fig. 1G), and most mitotic cells had a diffuse, basolateral or basal localization of LGN (Fig. 2B,B',K). Closer inspection revealed that cells with an apical localization of LGN accounted for about 86 $\pm$ 5.0% of all mitoses in wild-type tip cells, but in *Eya1*<sup>-/-</sup> distal epithelial tips, this number decreased markedly to about 5.0 $\pm$ 4.0% (Fig. 2C; *P*<0.05). These quantified data are further presented in the diagrams in Fig. 2J,K, in which each dot represents the centre of an LGN localization in a mitotic cell. Concomitantly, and as shown in Fig. 2M, spindle orientations were overwhelmingly lateral in *Eya1*<sup>-/-</sup> (i.e. parallel to the basement membrane), as measured in mitotic cells at most distal epithelial tips in *Eya1*<sup>-/-</sup> compared with control lungs (Fig. 2L) and following methods described by Lechler and Fuchs (Lechler and Fuchs, 2005). Similarly, most *Eya1*<sup>-/-</sup> distal epithelial cells had a diffuse or basolateral localization of NuMA and Insc, which were apically localized in wild-type lungs (Fig. 2D-I; 87.0 $\pm$ 6.0% versus 7 $\pm$ 5.6%, respectively; *P*<0.05), suggesting that *Eya1* deletion changes cell



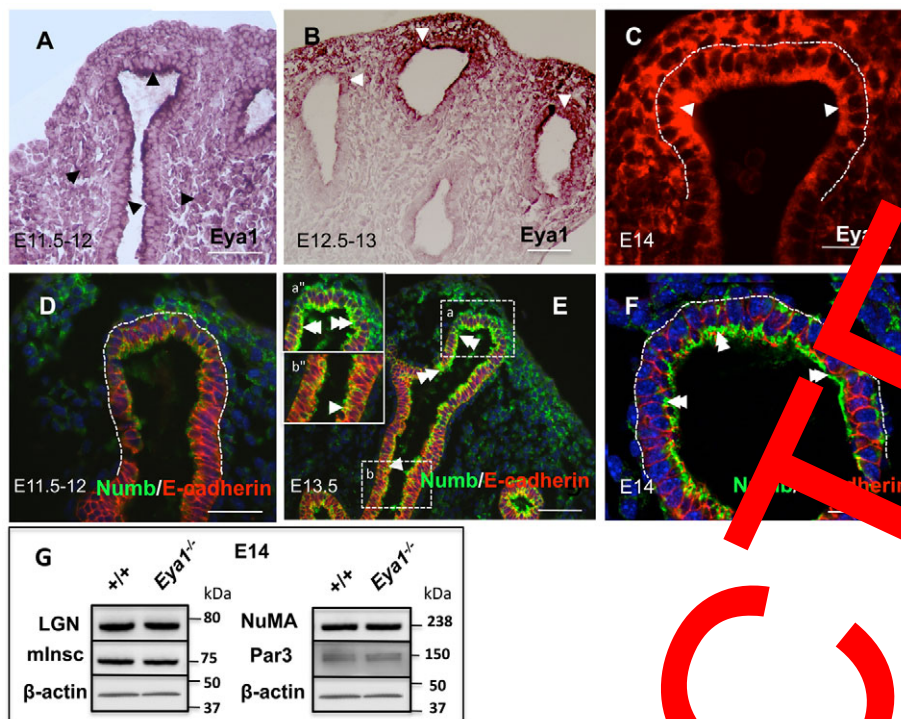

**Fig. 1. Eya1 and polarity proteins are expressed in the lung. (A-C)** Antibody staining shows widespread expression of Eya1 in both lung epithelium and mesenchyme at E11.5-E12.0 (arrowheads), and strong polarized Eya1 signals in the distal epithelium at E12.5-E14.0 (B,C; arrowheads). **(D)** Immunofluorescence shows very weak Numb expression at E11.5-E12.0 distal epithelium (D), and strong polarized Numb signals in the distal (inset a" in E and F; double arrowheads) rather than proximal epithelium (inset b" in E; arrowheads) from E13-E13.5. **(G)** Western blot shows no apparent changes in the expression of polarity proteins in E14 *Eya1*<sup>-/-</sup> lungs. Scale bars: 50 μm.

polarity/spindle orientation and induces lateral (i.e. planar) cell divisions. Similarly, interfering with Eya1 functions disrupted asymmetric localization of Par, myosin IIb (Myh10 – Mouse Genome Informatics) and F-actin (Actg1 – Mouse Genome Informatics) proteins (see Fig. S1 in the supplementary material).

To facilitate quantification of cells dividing perpendicularly versus laterally, we stained E14 *Eya1*<sup>-/-</sup> distal epithelium for centrosomes with anti-pericentrin antibody. Then, mitotic cells were quantified based on centrosome orientation relative to the basement membrane in order to distinguish parallel/lateral from perpendicular spindle alignments in mitotic cells. Centrosomes were oriented at 0±30° to the basement membrane were classed as parallel; those that were oriented at 90±30° were classed as perpendicular. In *Eya1*<sup>-/-</sup> distal epithelium, most divisions (87±3.0%) seemed to occur parallel/lateral to the basement membrane, while about 12±5% mitotic cells had an alignment that appeared perpendicular in contrast to wild-type cells where perpendicular alignments were abundant (Fig. S1,P).

### LGN, Insc and NuMA control spindle orientation, and Numb regulates the cell fate of lung epithelial cells in vitro depending on Eya1 phosphatase activity

Next, we addressed whether murine LGN, Insc and NuMA functions in the regulation of spindle orientation are conserved in the lung epithelium, using gene-specific siRNAs in the MLE15 lung epithelial cell line. MLE-15 cells were used in this study because of their intense expression of different polarity proteins and progenitor/differentiation cell markers. As in other epithelial cells (Lechler and Fuchs, 2005), LGN, NuMA, Insc, and Par3 had a mitosis-specific polarized distribution in MLE15 cells, often localizing asymmetrically to the cell cortex with one of the spindle poles positioned directly beneath, which indicates a perpendicular alignment of the spindle (see Fig. S2A,B,J,K,L in the supplementary material). Knock-down of *Insc*, *Gpr122* or *NuMA1* function caused obvious mitotic defects, as judged by the misoriented and disrupted

mitotic spindles in transfected cells, compared with control-siRNA-transfected cells (Fig. 3A-D and data not shown). Conversely, Eya1 expression did not apparently change after knockdown with the function of different polarity proteins in vitro (see Fig. S2Q-U in the supplementary material).

We next test Eya1 functions in controlling spindle-orientation-regulatory proteins in culture. Although polarization of LGN, NuMA and Insc in culture was more variable, it was observed in at least 60±7% and sometimes as many as 73±6% of mitotic MLE-15 cells (see Fig. S2I,M in the supplementary material). Upon *Eya1* knockdown, LGN/Insc/NuMA/Par3 were seen at both apical and basal cell sides or were diffuse (see Fig. S2C,D,N-P in the supplementary material). Thus, the percent of cells with a polarized localization of LGN/NuMA/Insc greatly decreased upon *Eya1* knockdown to about 6-8%. Rescuing Eya1 function by expressing wild-type murine *Eya1* construct, not targeted by the siRNAs, into these siRNA-transfected cells rescued the polarized distribution of LGN/NuMA/Insc proteins (see Fig. S2I,M in the supplementary material), while a phosphatase-dead mutant *Eya1* failed to rescue (examples are shown for LGN in Fig. S2A,C-H in the supplementary material). This suggests that the polarized localization of LGN/Insc/NuMA/Par, and hence proper spindle orientations are dependent on Eya1 phosphatase activity.

The polarity protein Numb is essential in maintaining vertebrate epithelial progenitors by allowing cells to choose progenitor over differentiation fates, and specifies cell fate by repressing Notch signaling (Petersen et al., 2004; Betschinger and Knoblich, 2004; Hutterer and Knoblich, 2005). We therefore investigated Numb functions in epithelial cell differentiation versus proliferation by staining MLE15 cells for SP-B (Sftpb – Mouse Genome Informatics) and Sox9, which are markers for epithelial differentiation and progenitor cells, respectively. As shown in Fig. 3E-I, the number of Sox9-positive cells increased fivefold (9.0±2.0% versus 50.3±5.0%, respectively; *P*<0.05), while SP-B-positive differentiated cells greatly decreased upon knockdown of *Numb* (60.0±4.0% versus 12.5±5.0%, respectively; *P*<0.05). Moreover, Notch signaling was activated upon

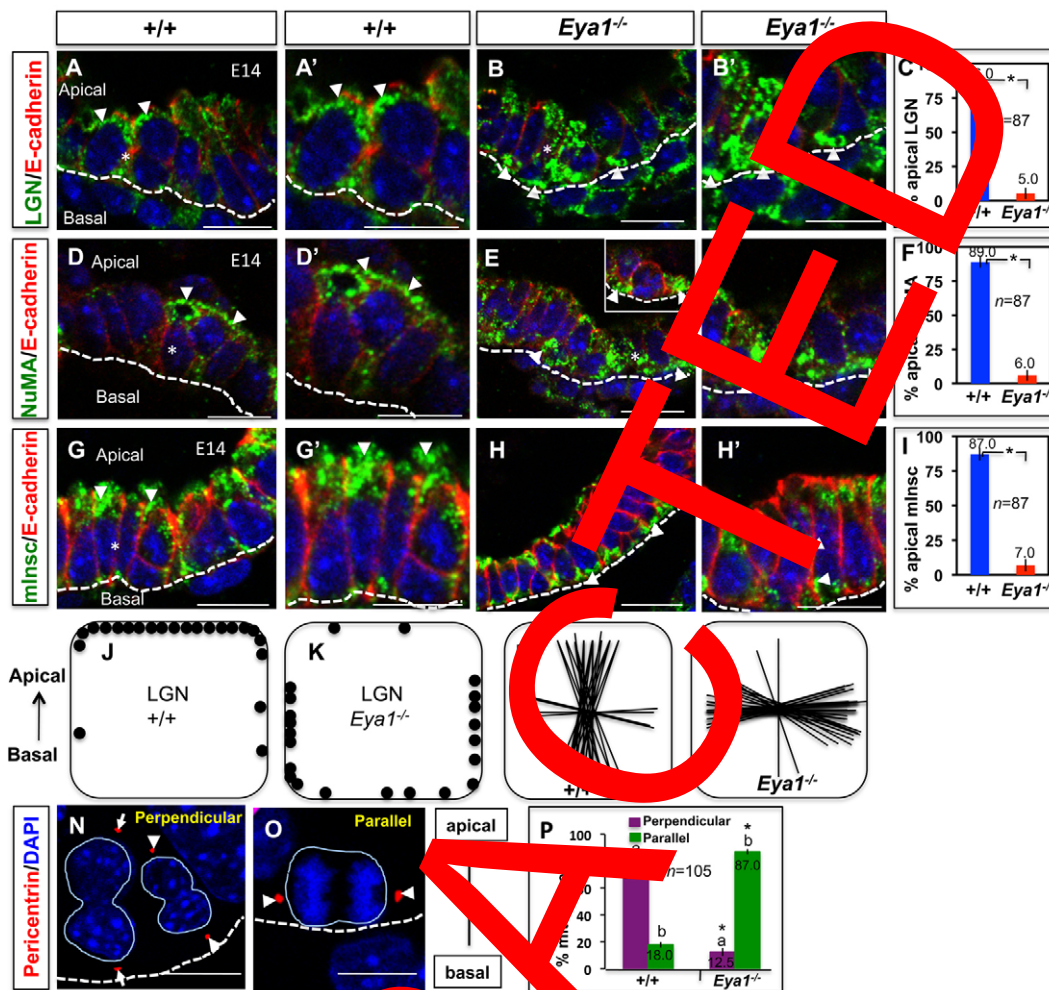

**Fig. 2. *Eya1* deletion causes mislocalization of spindle-regulatory proteins, and increases parallel spindle alignments in mitotic distal epithelium.** (A,A',B,B',D,D',E,E',G,G',H,H') Immunofluorescence images using specific antibodies shows that LGN, NuMA and Insc specifically localize to apical cell sides of wild-type distal epithelial cells (A,A',D,D',G,G',H,H'; arrowheads) and have a diffuse, basolateral or basal localization in *Eya1*<sup>-/-</sup> distal epithelial cells (B,B',E,E',H,H'; arrowheads). Broken line represents the collagen IV-stained basement membrane. A',B',D',E',G' are electronic magnifications from areas marked with asterisks in A,B,D,E,G respectively. (C,F,I) Quantification of mitotic distal epithelial cells with apical localization of LGN, NuMA or Insc for the experiments shown in A-H'. This is expressed as a percentage of all mitotic distal epithelial cells. \*Significantly different from control ( $P < 0.05$ ; Student's *t*-test). Error bars indicate s.e.m. (J,K) Schematic representation of LGN localization in wild-type (J) or *Eya1*<sup>-/-</sup> (K) distal epithelial cells. Each dot represents the centre of an LGN crescent in a single mitotic cell. (L,M) Schematic representation of spindle orientation in E14 wild-type (L) or *Eya1*<sup>-/-</sup> (M) distal epithelium. Each line represents the spindle axis of a single late mitotic cell. (N,O) Examples of distal epithelial mitotic cells that divide perpendicularly, as represented by the perpendicular orientation of pericentrin-stained centrosomes (arrowheads/arrows) relative to the basement membrane (broken line; N), and others that have their centrosomes aligned parallel to the basement membrane (O; arrowheads). (P) Quantitation of the spindle orientations, which is expressed as a percentage of all divisions in the distal epithelium, of the experiments shown in N,O for E14 wild-type/*Eya1*<sup>-/-</sup> lungs. Mitotic cells are quantified based on centrosome orientation relative to the basement membrane in order to distinguish parallel from perpendicular spindle alignments. Bars carrying the same letter (a,b) are significantly different from one another (\* $P < 0.05$ ; Student's *t*-test). Data are mean  $\pm$  s.e.m. Scale bars: 50  $\mu$ m.

*Numb* knockdown, as indicated by increased signal fluorescence intensity for the Notch target *Hes1/Hes5* and increased number of *Hes1*-positive cells (Fig. 5B). This suggests a conserved function for *Numb* in controlling cell fates via Notch signaling in the lung epithelium.

### ***Eya1* deletion enhances *Numb* expression and phosphorylation, but inhibits its asymmetric localization**

*Numb* regulates cell polarity and its phosphorylation/localization is controlled by apically localized Par proteins during the establishment of apical-basal polarity in mammalian epithelial

cells, which is necessary to maintain *Numb* asymmetric segregation into one of the daughter cells and its function as a cell fate determinant (Smith et al., 2007; Wang Z. et al., 2009).

The disrupted cell polarity, mislocalized Par3/6 and increased lateral (planar) divisions in *Eya1*<sup>-/-</sup> mitotic distal epithelium (Fig. 2; see Fig. S1 in the supplementary material) raise the possibility that *Numb* segregation/functions are disrupted in these cells, which result in distribution of *Numb* equally to their two daughters at cytokinesis after *Eya1* deletion. To test this possibility, we first examined *Numb* distribution in distal epithelial tips (Fig. 4). *Numb* concentrates in the cell-cortex area overlying one of the two spindle poles and is preferentially inherited by one of the two daughter



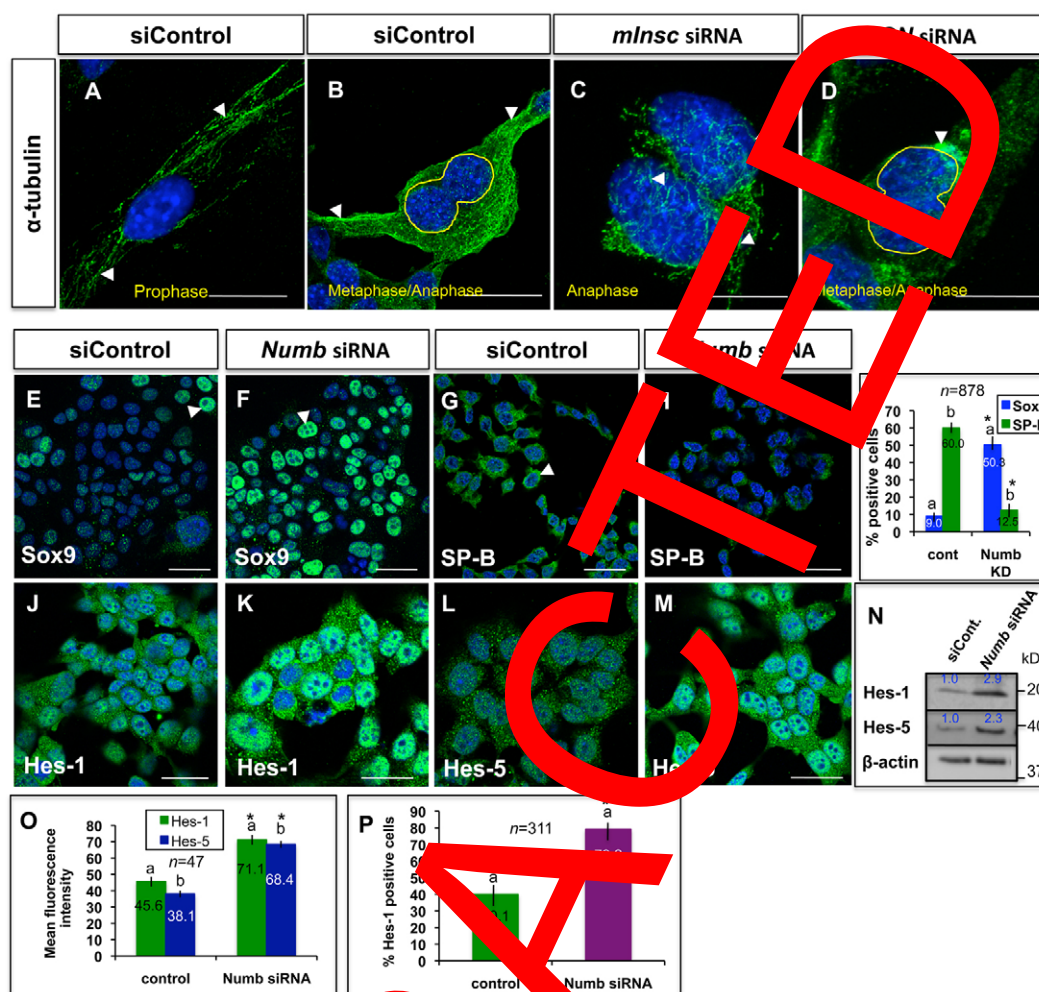

**Fig. 3. Functions of polarity proteins in lung epithelium in vitro.** (A,B) Immunocytochemistry with  $\alpha$ -tubulin antibody shows well-organized and oriented spindle fibers (arrowheads) in MLE15 cells during prophase (A) and mitosis (B). (C,D) Spindle fibers are disorganized/disoriented (arrowheads) in mitotic MLE15 cells after *Insc* or *Grim2* knockdown. (E-M) Immunocytochemistry shows that MLE15-positive cells (arrowheads) for Sox9 (F), Hes-1 (K) or Hes-5 (M) increase with strong nuclear staining, while SP-B-positive cells (H) decrease after *Numb* knockdown. (I) Quantitation of Sox9- or SP-B-positive cells, which is expressed as a percentage of all counted MLE15 cells, of the experiments shown in E-H. Bars carrying the same letter (a,b) in I, O or P are significantly different from each other ( $*P < 0.05$ ; Student's *t*-test). Data are mean  $\pm$  s.e.m. (N) Western blot of the experiments shown in J-M. (O) Means fluorescence intensity of Hes-1 or Hes-5 staining for experiments showing in J-M. (P) Quantitation of Hes-1-positive cells, which is expressed as a percentage of all counted MLE15 cells, of the experiments shown in J-K. In O,P, Error bars indicate s.e.m. Scale bars: 50  $\mu$ m.

cells during asymmetric cell division (Knoblich et al., 1995). In wild-type lungs, *Numb* was asymmetrically distributed and highly concentrated at the apical side of distal epithelial cells with a little or no staining at the basal pole (Fig. 4A,B). Conversely, *Numb* staining markedly increased, it was diffused and localized at both apical and basal cell poles in *Eya1*<sup>-/-</sup> distal epithelial cells (Fig. 4B,G).

Furthermore, closer inspection in mitotic cells revealed that *Numb* staining is consistently concentrated in a crescent at the apical pole of one (apical) daughter cell in 88  $\pm$  3% of wild-type distal epithelial tip cells (Fig. 4C,F). Conversely, *Numb* seemed to be inherited by both daughter cells in 84  $\pm$  6% of *Eya1*<sup>-/-</sup> mitotic distal tip cells (Fig. 4D-F). This suggests that the more planar (parallel) a cell division is (Fig. 2M,P), the more likely it is to segregate *Numb* preferentially to both daughter cells in mitotic *Eya1*<sup>-/-</sup> distal epithelial cells. This conclusion was further confirmed in mitotic MLE15 cells in vitro (Fig. 4M,N). *Numb*

staining was cortical and started to be confined to one side of the cell at prophase, then localized asymmetrically in metaphase/anaphase, and was inherited by one daughter cell in anaphase/telophase in most mitotic cells (Fig. 4M). Upon *Eya1* knockdown, *Numb* staining was diffuse in the cytoplasm at prophase and became cortical later in metaphase (Fig. 4N). *Numb* failed to localize asymmetrically in metaphase, and was inherited by both daughters in anaphase/telophase in most mitotic cells (Fig. 4N).

In mammalian epithelium, phosphorylation of phosphotyrosine-binding domain is essential for asymmetric localization of *Numb* to the cortical membrane (Dho et al., 2006; Smith et al., 2007). We therefore tested whether *Numb* phosphorylation changed in *Eya1*<sup>-/-</sup> lungs. *Numb* proteins were detected as two bands, with the higher band representing the modified form of *Numb* (Rhyu et al., 1994). If *Numb* phosphorylation changes, the modified form of *Numb*, which is the putative phosphorylated form, will increase in *Eya1*<sup>-/-</sup> lungs. Indeed, phosphorylated *Numb* increased in E14-

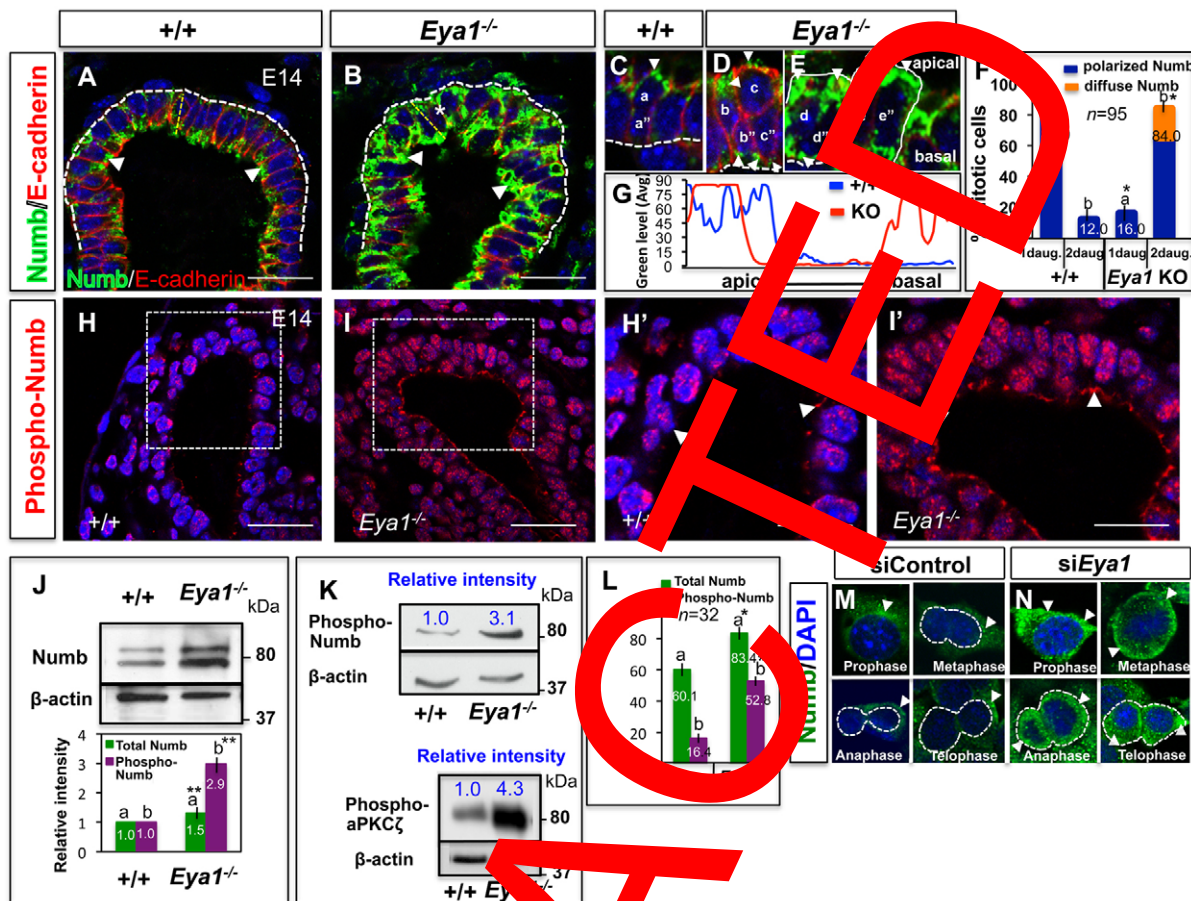

**Fig. 4. Eya1 is required for polarized apical localization and phosphorylation of Numb in distal epithelial cells.** (A,B) Immunofluorescence for Numb shows preferential Numb localization to the apical side of distal epithelial cells in wild-type lungs (A; arrowheads). (B) Increased Numb expression but loss of its asymmetric localization in *Eya1*<sup>-/-</sup> distal epithelium (arrowheads). (C-E) High magnification of wild-type/mutant mitotic distal epithelial cells at anaphase/telophase shows that Numb polarizes asymmetrically, and is inherited only by one daughter cell in wild-type lungs (a in C). a' is a daughter cell that does not inherit Numb. (D,E) Numb (arrowheads) fails to localize asymmetrically and is inherited by both daughter cells (b,b',c,c' in D and d,d',e,e' in E) in *Eya1*<sup>-/-</sup> mitotic distal epithelial cells with planar/parallel (D) or perpendicular (E, which represents the area marked with an asterisk in B) divisions relative to the collagen IV-stained basement membrane (thick white broken lines in A-E). (F) Quantification of late mitotic distal epithelial progenitors with Numb inherited by one (1daug.) or both (2daug.) daughter cells in E14 wild-type or *Eya1*<sup>-/-</sup> lungs. Bars carrying the same letter (a,b) in F are significantly different from one another (\**P*<0.05; Student's *t*-test). Data are mean±s.e.m. (G) Morphometric analysis of Numb signal intensity distribution of selected areas (thin yellow broken lines in A,B) shows loss of polarized/asymmetric localization of Numb, which is distributed at both apical and basal sides of *Eya1*<sup>-/-</sup> distal epithelium. (H-I') Immunostaining with specific Ser295 phospho-Numb antibody shows increased Numb phosphorylation in E14 *Eya1*<sup>-/-</sup> distal epithelium (I,I'; arrowheads: staining in the cytoplasmic side of cell membrane and in the nuclei) compared with control lungs (H,H'; arrowheads). (H',I') High magnification of boxed areas in panels H,I, respectively. (J,K) Western blots of E14 lungs with anti-Numb (J), anti-Ser-295 phospho-Numb or anti-tyrosine phosphorylated aPKCζ antibody (K) show increased Numb/aPKCζ phosphorylation in *Eya1*<sup>-/-</sup> lungs. Bars in J represent quantified western blot signals (mean±s.e.m., \*\**P*<0.001). Blue numbers in K represent relative band intensity. (L) Mean fluorescence intensity of total Numb or phospho-Numb staining compared between wild-type and *Eya1*<sup>-/-</sup> distal epithelium for experiments showing in A,B and H-I'. Error bars indicate s.e.m. (M,N) In control mitotic MLE15 cells, Numb (arrowheads) segregated asymmetrically and was inherited by one daughter cell in anaphase/telophase. Upon *Eya1* knockdown, Numb segregated to both daughters (N; arrowheads). Scale bars: 50 μm.

E14.5 *Eya1*<sup>-/-</sup> lungs (Fig. 4B). Moreover, phospho-Numb immunoreactivity using phospho-Numb (Ser-295) antibody increased in vivo (Fig. 4H,I') and was increased at the cell cortex and in the nuclei of *Eya1*<sup>-/-</sup> distal epithelium (Fig. 4H-I'). Furthermore, Fig. 4L compares the mean fluorescence intensity of phospho:total Numb of wild-type and *Eya1*<sup>-/-</sup> distal epithelium, showing that the phospho:total Numb was markedly altered between wild-type and *Eya1*<sup>-/-</sup> epithelium.

Similarly, a polarized Numb signal localized to one side of the cell was detected in MLE-15 cells in culture (Fig. 5A). Upon *Eya1* knockdown, Numb was not polarized, was localized uniformly to

the cytoplasm/cell membrane as small puncta and exhibited increased Ser295 phosphorylation (Fig. 5B,H,R). In the rescue experiments, re-expression of wild-type *Eya1*, not targeted by the siRNAs, rescued the polarized distribution and phosphorylation level of Numb, whereas re-expression of the tyrosine-phosphatase-dead mutant *Eya1* did not (Fig. 5C,D,I,J,R). This suggests that Numb phosphorylation is *Eya1* dependent.

Recently, we reported that *Eya1* controls the balance between self-renewal and differentiation of distal epithelial cells, where progenitor cells greatly decreased in number while differentiated cell number increased in *Eya1*<sup>-/-</sup> embryonic lung epithelium. In



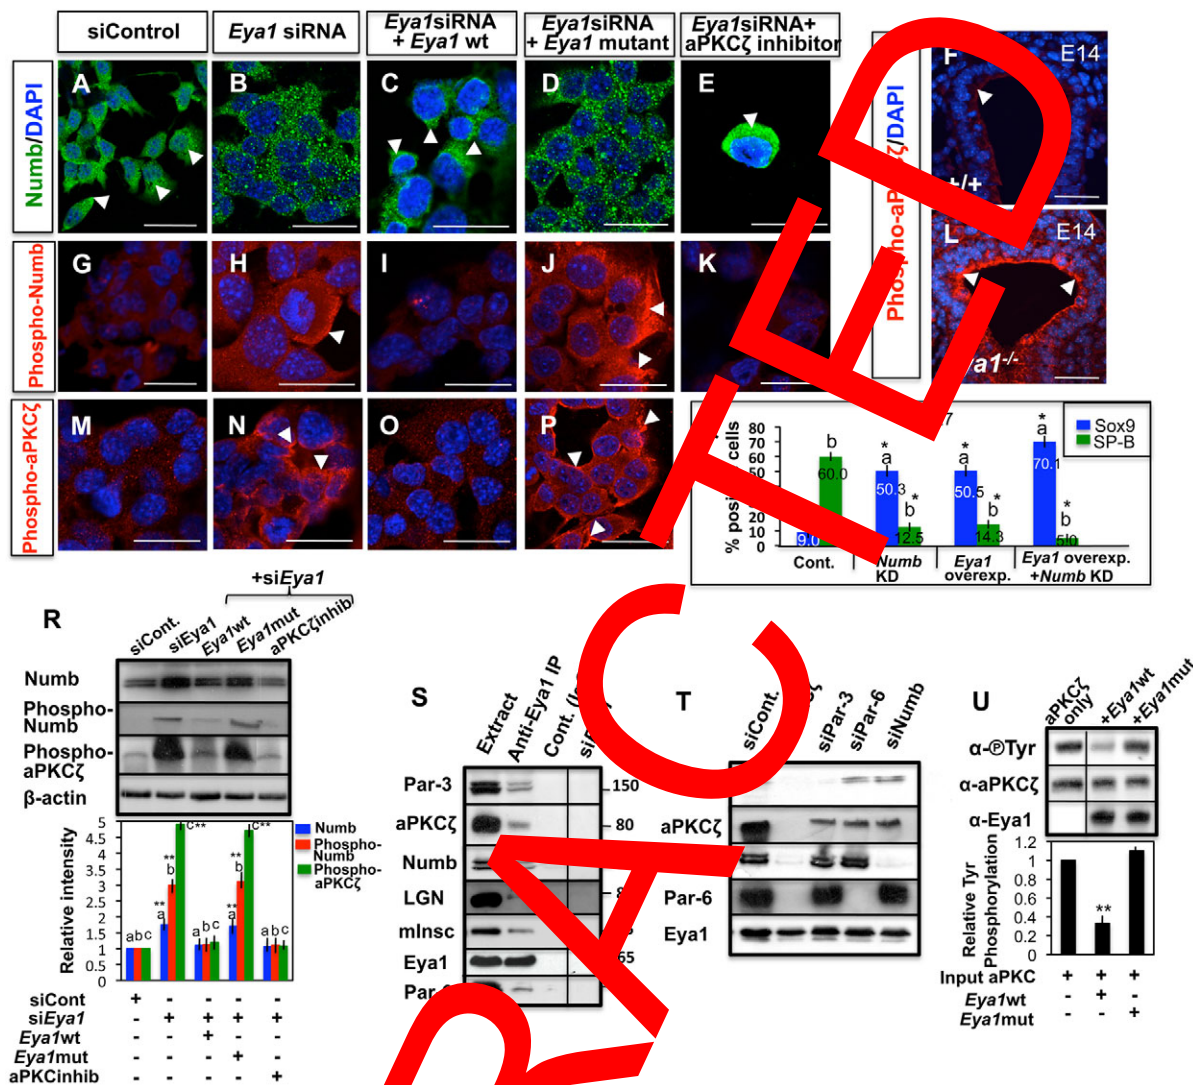

**Fig. 5. Eya1 regulates aPKC $\zeta$  and Numb phosphorylation.** (A,E,G,H,M,N) Antibody staining of MLE15 cells shows changes of Numb distribution/Ser295 phosphorylation (B,H; arrowheads) and aPKC $\zeta$  tyrosine phosphorylation (N; arrowheads) after *Eya1* knockdown compared with control cells. Arrowheads in A indicate polarized Numb staining. (C) Rescue of endogenous *Eya1* function by co-transfection of murine siRNA and murine wild-type or enzymatically inactivated mutant *Eya1* constructs (48 hours) in MLE15 cells reveals that Numb and aPKC $\zeta$  distribution/phosphorylation (arrowheads) are dependent on *Eya1* phosphatase activity. (E,K) Inhibition of aPKC $\zeta$  in *Eya1* siRNA-transfected MLE15 cells rescues Numb distribution/Ser295 phosphorylation (arrowhead). (F,L) Increased aPKC $\zeta$  tyrosine phosphorylation (arrowheads) in *Eya1*<sup>-/-</sup> distal lung epithelium. (Q) Quantitation of Sox9- or SP-B-positive cells, which is expressed as a percentage of all counted MLE15 cells, after interfering with the function of Numb and/or *Eya1*. Bars carrying the same letter are significantly different from the control of the same protein (\**P*<0.05; ANOVA-Dunnett test). Data are mean $\pm$ s.e.m. (R) Western blot of Numb, phospho-Numb or phospho-aPKC $\zeta$  for experiments showing in A-E,G-K,M-P. Bar graphs represent quantified western blot signals (mean $\pm$ s.e.m.). Bars carrying the same letter (a,b,c) are significantly different from the control of the same protein (\*\**P*<0.001; ANOVA-Dunnett test). (S) Endogenous *Eya1* was immunoprecipitated from AEC2 cells with a specific *Eya1* antibody and western blotting was performed with antibody specific to different polarity proteins. Anti-Eya1IP of *Eya1* siRNA-transfected cells was used as a control. (T) siRNA knockdown of endogenous aPKC $\zeta$  and different polarity proteins in epithelial cells (48 hours) and subsequent IP for *Eya1* and western blot for different polarity proteins. (U) In vitro phosphatase assay using immunopurified wild-type *Eya1* or enzymatically inactivated mutant protein (*Eya1* D323A) and aPKC $\zeta$  protein. Graph represents quantified western blot signals normalized to input (*n*=3; mean $\pm$ s.e.m., \*\**P*<0.001). Scale bars: 50  $\mu$ m.

addition, *Eya1* overexpression in MLE15 cells increases Sox9-positive progenitors cells, but decreases SP-B differentiated cells (El-Hashash et al., 2011) (Fig. 5Q; Fig. S3 in the supplementary material), similar to *Numb* knockdown effects (Fig. 3E-I). We therefore examined the magnitude of *Eya1* effects in balancing proliferation/differentiation of lung epithelial cells is changed in a *Numb* knockdown background in vitro. As shown in Fig. 5Q, the number of Sox9-positive progenitors increased

fivefold (9.0 $\pm$ 5.0% versus 50 $\pm$ 7.0%, *P*<0.05), while SP-B-positive differentiated cells decreased (60.0 $\pm$ 4.0% versus 12-14 $\pm$ 3.0%, respectively; *P*<0.05) following, respectively, *Numb* knockdown or *Eya1* overexpression in MLE-15 cells. Overexpression of *Eya1*, together with the knockdown of *Numb* in MLE15 cells led to a greater increase in the number of Sox9-positive cells (eightfold), and a more severe decrease in the number of SP-B-positive cells (45%; Fig. 5Q) compared with control cells.

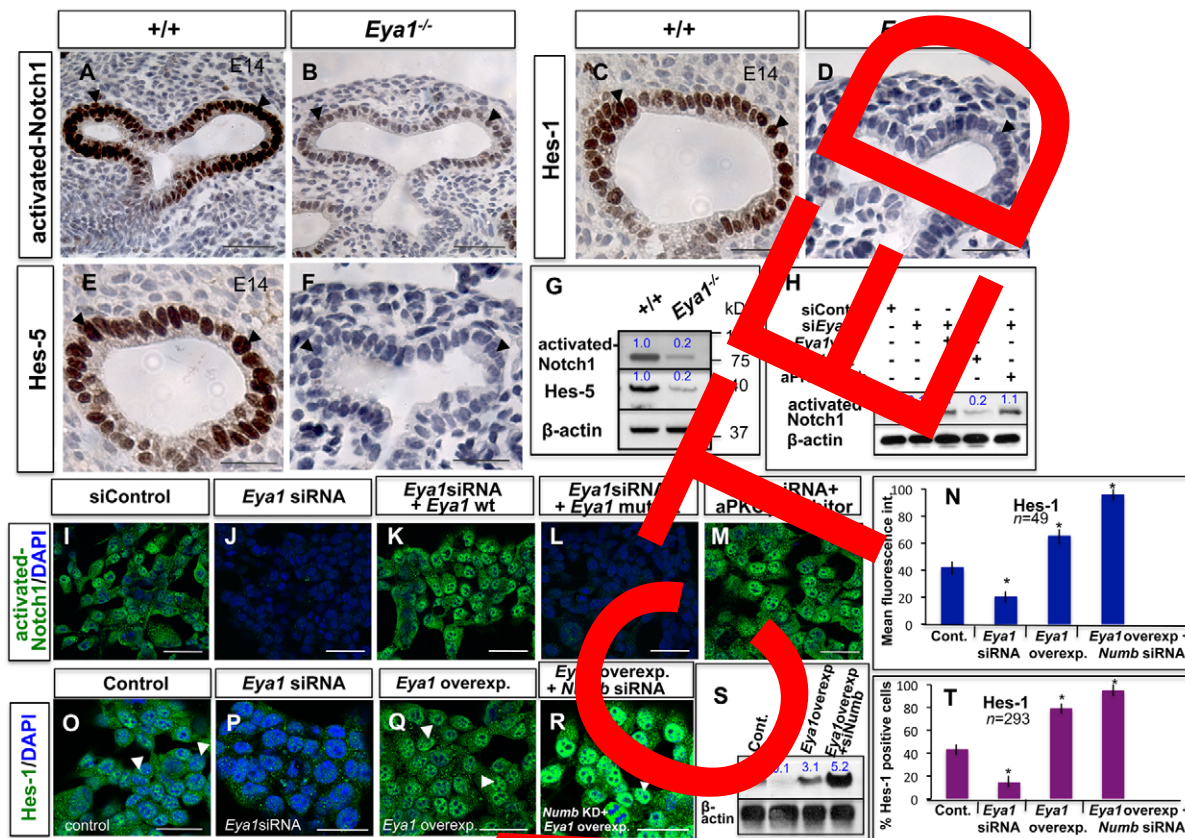

**Fig. 6. Inhibition of Notch signaling in *Eya1*<sup>-/-</sup> lung distal epithelium.** (A-F) Immunohistochemistry with specific antibodies shows reduced staining of activated-Notch1 (B), Hes1 (D) and Hes5 (F) in E14 *Eya1*<sup>-/-</sup> distal epithelium (arrowheads) compared with control lungs (A,C,E; arrowheads). (G) Western blots show reduction of activated-Notch1 and Hes-5 in E14 *Eya1*<sup>-/-</sup> lungs. (H) Western blot of activated-Notch1 for experiments shown in I-M. Blue numbers in G,H,S represent relative band density. (I,J) Immunocytochemistry shows reduced activated-Notch1 expression in MLE-15 after *Eya1* knockdown. (K,L) Rescue of endogenous *Eya1* function by co-transfection of murine siRNA and murine wild-type or enzymatically inactive mutant *Eya1* constructs for 48 hours in MLE15 cells reveals that Notch1 signaling/activity is dependent on *Eya1* phosphatase activity. (M) Inhibition of aPKC $\zeta$  in *Eya1* siRNA-transfected MLE15 cells rescues activated-Notch1 expression. (N) Mean fluorescence intensity of Hes1 staining for experiments showing I-O-R. \*Significantly different from control ( $P < 0.05$ ; ANOVA-Dunnett test). Error bars indicate s.e.m. (O-Q) Immunocytochemistry of MLE-15 cells shows decreased Hes1 expression after *Eya1* knockdown (O,P), but increased Hes-1 expression upon *Eya1* overexpression (Q; arrowheads). (R) Hes1-positive cells with strong nuclear staining further increase after co-transfection of *Numb* siRNA and wild-type *Eya1* expression vector in MLE-15 cells (arrowheads). (S) Western blot of Hes1 for experiments showing I-O-R. (T) Quantitation of Hes1-positive cells, which is expressed as a percentage of all cells in MLE15 cells, of the experiments shown in O-R. \*Significantly different from control ( $P < 0.05$ ; ANOVA-Dunnett test). Data are mean  $\pm$  s.e.m. Scale bars: 50  $\mu$ m.

### ***Eya1* is essential for atypical protein kinase C $\zeta$ (aPKC $\zeta$ ) phosphorylation**

*Eya1* has well-known tyrosine phosphatase activities (Li et al., 2003). As Numb phosphorylation increased in *Eya1*<sup>-/-</sup> lungs on Ser295 residue, which is phosphorylated by aPKC $\zeta$  leading to Numb asymmetric localization (Smith et al., 2007), we therefore tested whether tyrosine phosphorylated aPKC $\zeta$  is a direct substrate for *Eya1* phosphatase. aPKC $\zeta$  activity that is provided by a tyrosine phosphorylated aPKC $\zeta$  antibody increased both *in vivo* at the cell cortex of *Eya1*<sup>-/-</sup> distal epithelium, similar to Numb (Fig. 4K; Fig. 5F,L), and after *Eya1* knockdown in MLE15 cells *in vitro* (Fig. 5N,R). Rescuing *Eya1* function by expressing wild-type murine *Eya1* construct, not targeted by aPKC $\zeta$  antisense, into these *Eya1* siRNA-transfected cells led to near control level of phospho-aPKC $\zeta$ , whereas re-expression of the tyrosine-phosphatase-dead mutant *Eya1* did not (Fig. 5O,P,R). This suggests that increased Numb phosphorylation is likely to be due to the increased aPKC $\zeta$  activity/phosphorylation in *Eya1*<sup>-/-</sup> lungs. This conclusion was

confirmed by inhibiting aPKC $\zeta$  activity in *Eya1* siRNA-transfected MLE15 cells, which rescued the polarized distribution and phosphorylation level of Numb (compare Fig. 5A,B,G,H with 5E,K,R).

We next assessed *Eya1* phosphatase activity on aPKC $\zeta$  by co-immunoprecipitation. The endogenous aPKC $\zeta$  forms a complex with Par3/Par6/Numb, which binds to LGN/Insc/NuMA in epithelial cells (Lechler and Fuchs, 2005; Suzuki and Ohno, 2006; Nishimura and Kaibuchi, 2007). Expectedly, *Eya1* co-immunoprecipitated aPKC $\zeta$  and other polarity proteins in AEC2 cell lysate (Fig. 5S). To determine whether *Eya1* binds to aPKC $\zeta$ -Par-Numb/polarity protein complex by binding to aPKC $\zeta$ , we performed *Eya1*/aPKC $\zeta$  co-immunoprecipitation studies and analyzed other polarity proteins in cells treated with aPKC $\zeta$  siRNA. Indeed, co-immunoprecipitation of *Eya1*, Numb, Par/polarity proteins was not observed after aPKC $\zeta$  knockdown, but was observed after knocking down Numb or other polarity proteins (Fig. 5T).



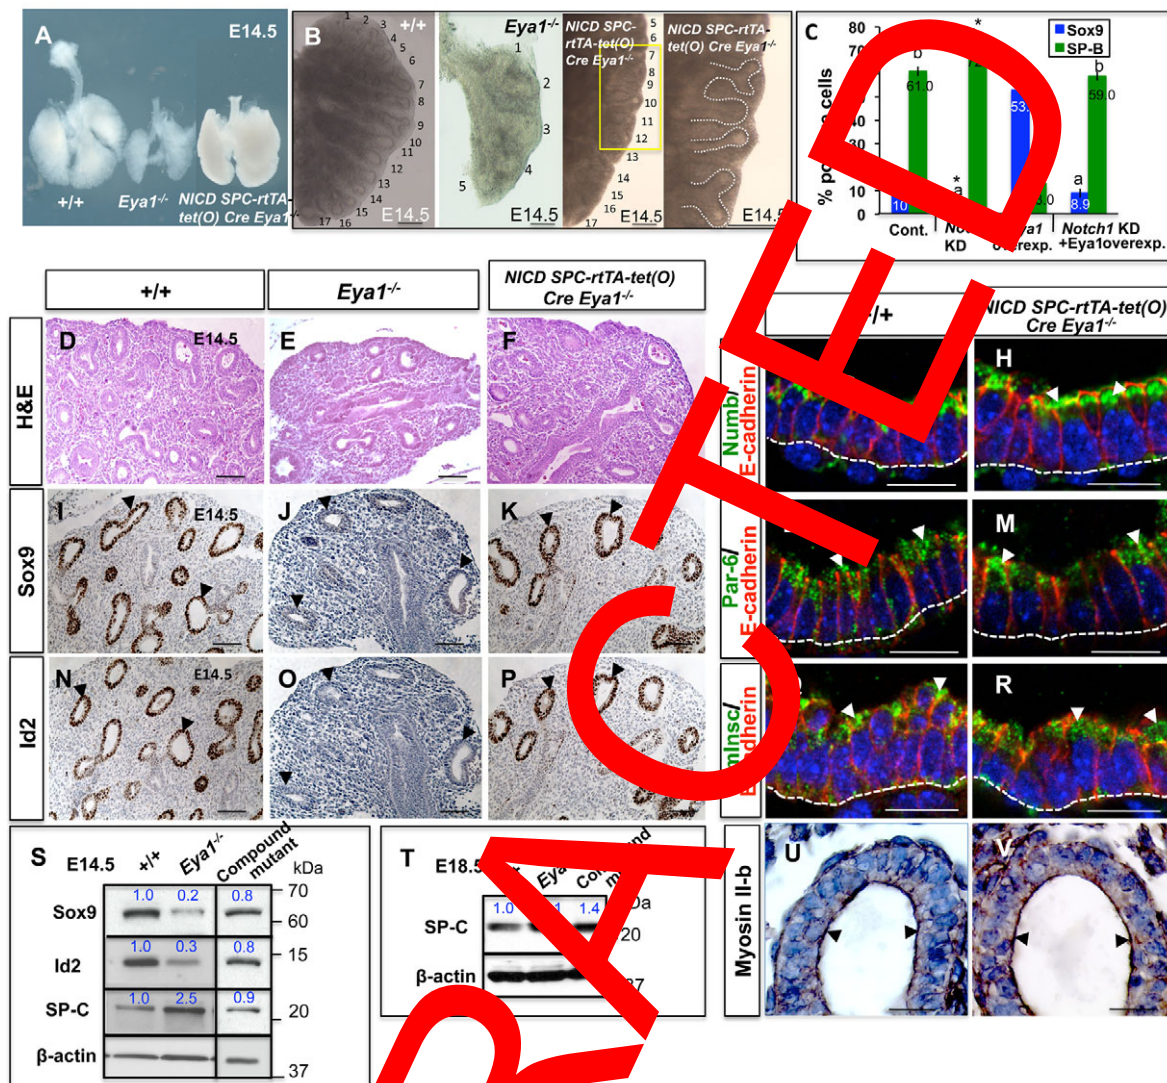

**Fig. 7. Genetic activation of Notch signaling in *Eya1*<sup>-/-</sup> lungs partially rescues epithelial progenitor defects and branching phenotype.**

(A,B,D-F) External appearance (A,B) and histological analysis (D-F) of control versus *Eya1*<sup>-/-</sup> lungs show reduced epithelial branching and size of *Eya1*<sup>-/-</sup> lungs, which are restored in *NICD; SPC-rtTA-tet(O) Cre Eya1*<sup>-/-</sup> compound mutant lungs (A,B,F). The last panel in B is high magnification of the yellow boxed area. (C) Quantitation of Sox9- or SP-B-positive cells, which is expressed as a percentage of all counted MLE15 cells, after interfering with the function of Notch1 and/or *Eya1*. \*Bars carrying the same letter (a,b) are significantly different from the control of the same protein ( $P < 0.05$ ; ANOVA-Dunnett test). Data are mean  $\pm$  s.e.m. (G,H,I,M,Q,R,U,V) Specific antibody staining shows similar polarized localization of polarity proteins (arrowheads) between compound mutant and wild-type lung distal epithelium. Broken lines represent the collagen IV-stained basement membranes. (I-K,N-P) Immunohistochemistry of lung sections shows reduced expression of progenitor markers Sox9 and Id2 in E14.5 *Eya1*<sup>-/-</sup> distal epithelium compared with control lungs (arrowheads). (K,P) Sox9/Id2 expression is substantially rescued in *NICD; SPC-rtTA<sup>+</sup>-tet(O) Cre<sup>+</sup>Eya1<sup>-/-</sup>* lungs (arrowheads). (S,T) Western blots show changes of the expression of Sox9, Id2 and SP-C between wild-type, *Eya1*<sup>-/-</sup> and compound mutant lungs. Blue numbers represent relative band intensity. Scale bars: 50  $\mu$ m.

To further determine whether aPKC $\zeta$  tyrosine phosphorylation might be a target of Eya1 phosphatase activity, we performed an in vitro phosphatase assay, mixing aPKC $\zeta$  protein with immunopurified HA-tagged Eya1. As shown in Fig. 5U, wild-type Eya1 significantly inhibited aPKC $\zeta$  phosphorylation, while the phosphatase-inactive mutant protein had no significant effect.

### Inhibition of Notch signaling in *Eya1*<sup>-/-</sup> lung distal epithelium

Numb functions as a negative regulator of Notch in mammals and *Drosophila* (French et al., 2002; Quette and Raff, 2002), and inactivated Notch1 signaling in MLE15 lung epithelial cells (Fig.

3J-P). As Eya1 controlled Numb segregation/function (Figs 4, 5), we next investigated whether Eya1 also regulates Notch signaling in distal lung epithelium.

Signals for activated (cleaved) Notch1 and for its downstream transcriptional targets Hes1 and Hes5 were strong in wild-type distal epithelium, but greatly decreased in *Eya1*<sup>-/-</sup> distal epithelium (Fig. 6A-F). This was also shown by immunoblot analysis (Fig. 6G). Similarly, activated Notch1 expression decreased after *Eya1* knock-down in MLE-15 cells (Fig. 6I,J,H). Rescuing Eya1 function by expressing wild-type murine *Eya1* construct, not targeted by the siRNAs, into these siRNA-transfected cells rescued the expression levels of activated-Notch1, while a phosphatase-dead mutant *Eya1*



failed to rescue (Fig. 6K,L,H). Interestingly, inhibition of aPKC activity in *Eya1* siRNA-transfected cells led to near-*Eya1* wild-type transfected level of activated Notch1 (Fig. 6K,M,H).

To determine whether Numb is involved in *Eya1* control of Notch signaling in the lung epithelium, we tested whether the magnitude of *Eya1* effects on Notch activity in MLE15 cells changes in a *Numb* knockdown background. As shown in Fig. 6N,R,S,T, Hes1 nuclear signal levels and Hes1-positive cells greatly increased, and were higher than Hes1 signals/number after either *Eya1* overexpression (Fig. 6Q,N,S,T) or *Numb* knockdown (Fig. 3J,K,N-P), carried out separately in MLE15 cells.

### Genetic activation of Notch signaling in *Eya1*<sup>-/-</sup> lungs partially rescues epithelial progenitor defects and branching phenotype

Notch signaling promotes progenitor cell identity at the expense of differentiated cell phenotypes (Jadhav et al., 2006; Mizutani et al., 2007). It also controls cell fates in developing airways (Tsao et al., 2009), while Notch activation inhibits the differentiation of distal lung progenitors into alveolar cells (Guseh et al., 2009). Loss of epithelial progenitors from E14-E14.5, reduced epithelial branching/lung size and increased epithelial differentiation are major *Eya1*<sup>-/-</sup> lung phenotypes (Fig. 7A-E,I,J,N,O,S,T; see Fig. S3 in the supplementary material) (El-Hashash et al., 2011). We therefore tested the hypothesis that inactivation of Notch signaling causes the epithelial defects in *Eya1*<sup>-/-</sup> embryos by conditional genetic increase of *Notch1* levels in *Eya1*<sup>-/-</sup> lung epithelium, using *NICD*; *Spc-rtTA*<sup>+/+</sup>-*tet(O)* *Cre*<sup>+/+</sup>-*Eya1*<sup>-/-</sup> compound mutant mice. No changes in lung phenotype or gene/protein expression were evident in controls: DOX-fed *Spc-rtTa* and *Spc-rtTa-tet(O)* *Cre* mice (data not shown).

*NICD*; *Spc-rtTA*<sup>+/+</sup>-*tet(O)* *Cre*<sup>+/+</sup>-*Eya1*<sup>-/-</sup> compound mutant lungs were comparable with doxycycline-untreated control lungs, albeit smaller in size (Fig. 7A). Following induction with DOX feeding, they showed increased lung size and restoration of epithelial branching and expression of distal epithelial progenitor markers compared with lungs of *Eya1*<sup>-/-</sup> littermates (Fig. 7A-F,I-K, see Fig. S3A-C in the supplementary material). Moreover, the polarized cortical localization of polarity proteins (Fig. 7G,H,L,M,Q,R,U,V) and the expression levels of epithelial differentiation markers (Fig. 7S,T; Fig. S3D in the supplementary material) were restored into the wild-type control range in compound mutant lungs versus *Eya1*<sup>-/-</sup> lungs, suggesting partial but substantial rescue of the *Eya1*<sup>-/-</sup> epithelial lung phenotype.

Finally, we examined whether the magnitude of *Eya1* effects in balancing proliferation/differentiation of lung epithelial cells is blunted in a *Notch1* knockdown background in MLE-15 cells. As shown in Fig. 7C, *Notch1* knockdown reduced Sox9-positive progenitors (60%; 10±3.0% versus 4.2±3.0%), but increased SP-B-positive differentiated cells (61.0±4.0% versus 72±4.0%, respectively; *P*<0.05). By contrast, the number of Sox9-positive progenitors increased fivefold, and SP-B-positive cells greatly decreased (78%) upon *Eya1* overexpression. These changes were blunted and the percentage of cells that are positive for Sox9 or SP-B was restored into the control range in cells co-transfected with *Numb* siRNA and wild-type *Eya1* expression vector versus *Eya1*-overexpressing cells alone (Fig. 7D).

### DISCUSSION

The function and growth of pulmonary epithelial cells lining the distal tubes/air sacs depend on cell polarity, which its loss is involved in lung cancers, chronic obstructive pulmonary disease

and disruption of lung epithelial differentiation (Matsui et al., 1999; Xu et al., 2006). Yet, cell polarity proteins remain uncharacterized in lung epithelium. Herein, we demonstrate that distal lung epithelium, which represents the epithelial progenitor pool (Rawlins et al., 2009), is polarized with characteristic perpendicular divisions that are controlled by *Eya1* phosphatase.

### *Eya1* controls cell polarity and mitotic spindle orientation in embryonic distal lung epithelium

Mammalian *Eya1* protein phosphatase has been implicated in cell polarity, because progressive *Eya1* depletion results in the loss of polarity in airway cells during inner ear development (Zou et al., 2008). Here, we extended these observations to the lung to demonstrate that *Eya1* is crucial for the maintenance of cell polarity and mitotic spindle orientation of distal epithelium. *Eya1*<sup>-/-</sup> distal epithelial cells exhibited a severe perturbation in the asymmetric localization and organization of several polarity proteins (Figs 2, 4 and 5; see Figs S1, S2 in the supplementary material). Similarly, members of protein phosphatase family are crucial regulators of cell polarity and spindle orientation in *Drosophila* epithelial cells (Gong et al., 2009; Ogawa et al., 2009).

How does *Eya1* protein function to maintain cell polarity and control mitotic spindle orientation? From the present study, *Eya1* appears to exert this effect by influencing multiple processes, including the apical cell localization of Par, Insc, LGN and NuMA proteins, which are evolutionarily conserved and essential for the maintenance of cell polarity/spindle orientation, as well as aPKCζ/ Numb phosphorylation (discussed below). In mammalian epithelium, the Par3/6 proteins localize predominantly to apically adjacent cell junctions and bind to aPKCζ, Insc and LGN. This binding is crucial for the establishment of epithelial polarity and for apical-basal/perpendicular spindle orientation (Macara, 2004; Suzuki and Ohno, 2006; Siller and Doe, 2009). Thus, the proper localization of aPKCζ-Par3/6-LGN-Insc polarity complex is crucial for cell polarization (Ohno, 2001). Our findings that *Eya1* may bind to aPKCζ and that *Eya1* deletion causes mislocalization of Par/Insc/LGN, together with increased planar cell divisions at the expense of perpendicular/apical-basal division (Figs 2, 5; see Figs S1, S2 in the supplementary material), provide strong evidence that *Eya1* is indeed required for controlling cell polarity and spindle orientation in the embryonic lung.

### *Eya1* regulates Numb segregation and Notch signaling in distal lung epithelium

Notch signaling is used for cell fate determination throughout the animal kingdom, and differences in Notch activity between two daughter cells determine their future fates. Thus, Notch signaling promotes progenitor cell identity at the expense of differentiated cell phenotypes (Jadhav et al., 2006; Mizutani et al., 2007). Differences in the Notch activities between two daughter cells can be specified by the asymmetric localization and inheritance of Numb, a negative regulator of the Notch pathway (Guo et al., 1996; Cayouette et al., 2001; Petersen et al., 2002; Shen et al., 2002). In the embryonic lung, Notch signaling controls cell fates in developing airways (Post et al., 2000; Tsao et al., 2008; Tsao et al., 2009), and Notch activation inhibits the differentiation of distal progenitors into alveolar cells (Guseh et al., 2009). Yet the role of asymmetric segregation of cell fate determinant/Notch inhibitor Numb during lung development, and the way the process might be regulated are still unknown.

Herein, the failure of polarized Numb localization after *Eya1* knockout/knockdown (Figs 4, 5) supports our conclusion that one of the principal functions of *Eya1* is the regulation of asymmetric

Numb localization/segregation in mitotic lung epithelium. This is further confirmed by our finding that Eya1 phosphatase controls aPKC $\zeta$  phosphorylation, which is essential for Numb phosphorylation and asymmetric localization/segregation (Dho et al., 2006; Smith et al., 2007), as reported for other phosphatases (Nunbhakdi-Craig et al., 2002). Indeed, aPKC $\zeta$ -dependent phosphorylation of Numb inhibits its cortical/polarized localization (Casanova, 2007). Increased Numb expression in *Eya1*<sup>-/-</sup> epithelium provides further evidence, because Numb localization is also inhibited upon overexpression of the protein, presumably as a result of saturation of the localization machinery (Rhyu et al., 1994). Upon overexpression, Numb is segregated into both daughter cells that then adopt the fate of the daughter that normally inherits Numb (Rhyu et al., 1994). Moreover, mislocalization and perturbation of Par3/6 and myosin IIB, together with inactivation of Notch signaling, in *Eya1*<sup>-/-</sup> lungs further support our hypothesis of Eya1 control of Numb segregation/expression, because myosin IIB and Par proteins regulate Numb asymmetric segregation/localization (Barros et al., 2003; Betschinger and Knoblich, 2004). Moreover, high levels of Notch activation cause a reduction in Numb protein levels (Chapman et al., 2006).

Furthermore, the lack of polarized Numb localization, and consequently loss of the difference in Numb levels between two daughter cells (both inherit Numb) may be responsible for the failure of *Eya1*<sup>-/-</sup> cells to upregulate Notch signaling pathway and hence to execute the epithelial progenitor cell self-renewal program at distal tips. This may explain enhanced epithelial differentiation and the great reduction of both Notch activity and expression of epithelial progenitor cell markers in the *Eya1*<sup>-/-</sup> lung (Figs 4-7; see Fig. S3 in the supplementary material). Indeed, Numb in daughter cells acts to inhibit Notch signaling (Chapman et al., 2006). Consistent with our results, *Eya1* abrogation inhibits Notch signaling during sensory progenitor development in mammalian inner ear (Zou et al., 2008), whereas high levels of *Eya1* inhibit neuronal differentiation, but expand the pool of proliferative neuronal progenitors (Schlosser et al., 2008). Our findings that genetically increasing Notch activity in *Eya1*<sup>-/-</sup> lungs substantially rescues the abnormal lung epithelial phenotype *in vivo* (Fig. 7; see Fig. S3 in the supplementary material) provide strong evidence that Eya1 is indeed required for controlling Notch signaling activity to ensure appropriate self-renewal/differentiation of lung distal epithelium. Whether Eya1 directly or indirectly regulates Notch signaling will be the subjects of future study.

In our future studies, we plan to use a conditional knockout approach to delete *Eya1* specifically from the epithelial compartment to further investigate its specific functional roles in epithelial cell development. Nonetheless, the *Eya1* mutants reported herein provide a new mouse model for congenital lung hypoplasia/malformations and help us to understand the mechanisms that control lung epithelial morphogenesis.

### Does distal lung epithelium provide asymmetrically? Does Eya1 phosphatase control asymmetric division in the lung?

Recent reports suggest that undifferentiated lung epithelial progenitors undergo multiple division-linked cell fate decisions [symmetric and asymmetric cell division (ACD)] that lead to an apparently homogeneous expansion of the progenitor cell population (Rawlins, Smith and et al., 2008). No reports about ACD in the embryonic lung have appeared as yet to our knowledge, but our study provides some evidence to suggest that distal lung epithelial cell populations that contain progenitor cells (Rawlins et

al., 2009) divide asymmetrically. For example, most of the distal epithelial cells had apical localization of Insc, LGN, NuMA and Par proteins, with mitotic spindles aligned perpendicular to the basement membrane and a characteristic asymmetric segregation/inheritance of Numb (Figs 1, 2; see Fig. S3 in the supplementary material). Indeed, a strong correlation exists between ACD and the apical localization of the polarity proteins, perpendicular alignment of mitotic spindles and asymmetric Numb segregation in *Drosophila*/mammalian epithelium (Cayouette and Raff, 2002; Cayouette and Raff, 2003; Haydar et al., 2003; Noctor et al., 2004; Lechler and Leuchs, 2005). In this regard, our data suggest a crucial role for Eya1 in controlling ACD, similar to other phosphatases (Wang et al., 2005; Kawawa et al., 2009), because *Eya1* abrogation perturbs the organization of polarity proteins and spindle orientation, as well as Numb segregation in distal embryonic lung epithelium, providing a conceptual framework for future mechanistic studies in this area.

### Acknowledgements

We thank Drs M. Rosenfeld, Hegde, P. Nare and K. Kiyosh for Eya1 constructs/proteins. This study was funded by NIH-NHLBI P01 HL 60231, RO1s HL60, HL44977 and GM grants, and by a CIRM grant to D.W. and A.H.E.-M. Deposited in PMC for release after 12 months.

### Competing interests statement

The authors declare no competing financial interests.

### Supplementary material

Supplementary material for this article is available at <http://dev.biologists.org/lookup/suppl/doi:10.1242/dev.058479/-/DC1>

- Betschinger, J., Phelps, C. and Brand, A. H. (2003). *Drosophila* nonmuscle myosin II promotes the asymmetric segregation of cell fate determinants by cortical exclusion rather than active transport. *Dev. Cell* **5**, 829-840.
- Betschinger, J. and Knoblich, J. A. (2004). Dare to be different: asymmetric cell division in *Drosophila*, *C. elegans* and vertebrates. *Curr. Biol.* **14**, R674-R685.
- Chop, A. E. (2004). Pulmonary epithelial stem cells. *Cell Prolif.* **37**, 89-96.
- Di Lino, S., Safdar, Z., Welsh, D., Bhattacharya, J. and Koval, M. (2004). Cell-cell interactions in regulating lung function. *Am. J. Physiol. Lung Cell Mol. Physiol.* **287**, L455-L459.
- Duckley, S., Barsky, L., Weinberg, K. and Warburton, D. (2005). In vivo inosine protects alveolar epithelial type 2 cells against hyperoxia-induced DNA damage through MAP kinase signaling. *Am. J. Physiol. Lung Cell Mol. Physiol.* **288**, L569-L575.
- Buteau, J., Foisy, S., Rhodes, C., Carpenter, L., Biden, T. and Prentki, M. (2001). Protein kinase C $\zeta$  activation mediates glucagon-like peptide-1-induced pancreatic  $\beta$ -cell proliferation. *Diabetes* **50**, 2237-2243.
- Cardoso, W. V. (2000). Lung morphogenesis revisited: old facts, current ideas. *Dev. Dyn.* **219**, 121-30.
- Carraro, G., El-Hashash, A., Guidolin, D., Tiozzo, C., Turcatel, G., Young, B., De Langhe, S., Bellusci, S., Shi, W., Parnigotto, P. P. et al. (2009). miR-17 family of microRNAs controls FGF10-mediated embryonic lung epithelial branching morphogenesis through MAPK14 and STAT3 regulation of E-Cadherin distribution. *Dev. Biol.* **333**, 238-250.
- Casanova, J. E. (2007). PARTitioning Numb. *EMBO Rep.* **8**, 233-235.
- Cayouette, M. and Raff, M. (2002). Asymmetric segregation of Numb: a mechanism for neural specification from *Drosophila* to mammals. *Nat. Neurosci.* **5**, 1265-1269.
- Cayouette, M. and Raff, M. (2003). The orientation of cell division influences cell-fate choice in the developing mammalian retina. *Development* **130**, 2329-2339.
- Cayouette, M., Whitmore, A. V., Jeffery, G. and Raff, M. (2001). Asymmetric segregation of Numb in retinal development and the influence of the pigmented epithelium. *J. Neurosci.* **21**, 5643-5651.
- Cereijido, M., Shoshani, L. and Contreras, R. G. (2000). Molecular physiology and pathophysiology of tight junctions. I. Biogenesis of tight junctions and epithelial polarity. *Am. J. Physiol. Gastrointest. Liver Physiol.* **279**, G477-G482.
- Chapman, G., Liu, L., Sahlgren, C., Dahlqvist, C. and Lendahl, U. (2006). High levels of Notch signaling down-regulate Numb and Numlike. *J. Cell Biol.* **175**, 535-540.
- Chen, X. P., Yin, H. and Huffaker, T. C. (1998). The yeast spindle pole body component Spc72p interacts with Stu2p and is required for proper microtubule assembly. *J. Cell Biol.* **141**, 1169-1179.

- Coletta, R. D., Christensen, K., Reichenberger, K., Lamb, J., Micomnaco, D., Wolf, D., Müller-Tidow, C., Golub, T., Kawakami, K. and Ford, H. L. (2004). The Six1 homeoprotein stimulates tumorigenesis by reactivation of cyclin A1. *Proc. Natl. Acad. Sci. USA* **101**, 6478-6483.
- Cook, P. J., Ju, B., Telesse, F., Wang, X., Glass, C. and Rosenfeld, M. G. (2009). Tyrosine de-phosphorylation of H2AX modulates apoptosis and survival decisions. *Nature* **458**, 591-596.
- Davies, S. P., Reddy, H., Caivano, M. and Cohen, P. (2000). Specificity and mechanism of action of some commonly used protein kinase inhibitors. *Biochem. J.* **351**, 95-105.
- del Moral, P. M., De Langhe, S., Sala, F., Veltmaat, J., Tefft, D., Wang, K., Warburton, D. and Bellusci, S. (2006a). Differential role of FGF9 on epithelium and mesenchyme in mouse embryonic lung. *Dev. Biol.* **293**, 77-89.
- del Moral, P. M., Sala, F., Tefft, D., Shi, W., Keshet, E., Bellusci, S. and Warburton, D. (2006b). VEGF-A signaling through Flk-1 is a critical facilitator of early embryonic lung epithelial to endothelial crosstalk and branching morphogenesis. *Dev. Biol.* **290**, 177-188.
- Dho, S. E., Trejo, J., Siderovski, D. and McGlade, C. J. (2006). Dynamic regulation of mammalian numb by G protein-coupled receptors and protein kinase C activation: structural determinants of numb association with the cortical membrane. *Mol. Biol. Cell* **17**, 4142-4155.
- Dobbs, L., Gonzales, G. and Williams, M. (1986). An improved method for isolating type II cells in high yield and purity. *Am. Rev. Respir. Dis.* **134**, 141-145.
- Drubin, D. G. and Nelson, W. J. (1996). Origins of cell polarity. *Cell* **84**, 335-344.
- Dutil, E. M., Keranen, L., DePaoli-Roach, A. and Newton, A. C. (1994). *In vivo* regulation of protein kinase C by trans-phosphorylation followed by autophosphorylation. *J. Biol. Chem.* **269**, 29359-29362.
- Dutil, E. M., Toker, A. and Newton, A. C. (1998). Regulation of conventional protein kinase C isozymes by phosphoinositide-dependent kinase 1 (PDK-1). *Curr. Biol.* **8**, 1366-1375.
- El-Hashash, A. H., Alam, D., Turcatel, G., Bellusci, S. and Warburton, D. (2011). Eyes absent 1 (Eya1) is a critical coordinator of epithelial, mesenchymal and vascular morphogenesis in the mammalian lung. *Dev. Biol.* (in press).
- Ford, H. L., Kabingu, E. N., Bump, E., Mutter, G. and Pardee, A. B. (1998). Abrogation of the G2 cell cycle checkpoint associated with overexpression of HSIX1: a possible mechanism of breast carcinogenesis. *Proc. Natl. Acad. Sci. USA* **95**, 12608-12613.
- Fougerousse, F., Durand, M., Lopez, S., Suel, L., Demignon, J., Thoenen, H., Ozaki, H., Kawakami, K., Barbet, P., Beckmann, J. and Maire, P. (2002). Six and Eya expression during human somitogenesis and MyoD gene family activation. *J. Muscle Res. Cell Motil.* **23**, 255-264.
- French, M. B., Koch, U., Shaye, R. E., McGill, M. A., Dho, S. E., Guidos, C. J. and McGlade, C. J. (2002). Transgenic expression of numb inhibits notch signaling in immature thymocytes but does not alter T cell fate specification. *J. Immunol.* **168**, 3173-3180.
- Guo, M., Jan, L. and Jan, Y. N. (1996). Control of daughter cell fates during asymmetric division: interaction of Numb and Notch. *Neuron* **17**, 27-41.
- Guseh, J. S., Bores, S. A., Stanger, B. Z., Zhou, Q., Anderson, W. J., Tamm, D. A. and Rajagopal, J. (2009). Notch signaling promotes airway metaplasia and inhibits alveolar development. *Development* **136**, 1750-1759.
- Haydar, T. F., Ang, E., Jr and Rakic, P. (2003). Mitotic spindle orientation and mode of cell division in the developing telencephalon. *Proc. Natl. Acad. Sci. USA* **100**, 2890-2895.
- Hutterer, A. and Knoblich, J. A. (2005). Numb and alpha-Adaptin regulate Sanpodo endocytosis to specify cell fate in *Drosophila* external sensory organs. *EMBO Rep.* **6**, 836-842.
- Jadhav, A. P., Cho, S. and Cepko, C. L. (2006). Notch activation permits retinal cells to progress through multiple progenitor states and acquire a self-renewal property. *Proc. Natl. Acad. Sci. USA* **103**, 18998-19005.
- Jemc, J. and Rebay, I. (2007). The eyes absent family of phosphotyrosine phosphatases: properties and roles in developmental regulation of transcription. *Annu. Rev. Biochem.* **76**, 513-538.
- Knoblich, J. A., Jan, L. Y. and Jan, Y. N. (1995). Asymmetric segregation of Numb and Prospero during cell division. *Nature* **378**, 624-627.
- Lechler, T. and Fuchs, E. (2005). Asymmetric cell divisions promote stratification and differentiation of mammalian skin. *Nature* **437**, 275-280.
- Li, X., Oghi, K., Zhang, J., Krone, A., Glass, C., Tam, S., Aggarwal, A., Maas, R., Rose, D. and Reed, M. C. (2003). Eya protein phosphatase activity regulates Six1-Dach-Eya transcriptional effects in mammalian organogenesis. *Genes Dev.* **17**, 238-239.
- Lu, Y., Okubo, T., Rawlins, E. L. and Hogan, B. L. (2008). Epithelial progenitor cells of the embryonic lung and the role of microRNAs in their proliferation. *Proc. Am. Thorac. Soc.* **5**, 300-304.
- Macara, I. G. (2004). Polar proteins: partners in polarization. *Curr. Biol.* **14**, R160-R162.
- Matsui, R., Brody, J. and Kohn, J. (1999). FGF-2 induces surfactant protein gene expression in foetal rat lung epithelial cells through a MAPK-independent pathway. *Cell Signal.* **11**, 221-228.
- Metzger, R. J., Klein, O. D., Martin, G. R. and Kransow, M. A. (2008). The branching programme of mouse lung development. *Nature* **453**, 745-750.
- Mizutani, K., Yoon, K., Dang, L., Tokunaga, A. and Gaiano, N. (2007). Differential Notch signalling distinguishes neural stem cells from intermediate progenitors. *Nature* **449**, 350-355.
- Mostov, K. E., Verges, M. and Altschuler, Y. (2000). Membrane traffic in polarized epithelial cells. *Dev. Opin. Cell Biol.* **12**, 484-490.
- Nelson, W. J. (2003a). Epithelial cell polarity from the outside looking in. *News Physiol. Sci.* **18**, 143-147.
- Nelson, W. J. (2003b). Adaptation of core mechanisms to generate cell polarity. *Nature* **422**, 766-774.
- Nishimura, T. and Kurouchi, K. (2007). Numb controls integrin endocytosis for directional cell migration with aPKC and PAR-3. *Dev. Cell* **13**, 15-28.
- Noctor, S. C., Martinez-Cerdeza, V., Ivic, L. and Kriegstein, A. R. (2004). Cortical neurogenesis in symmetric and asymmetric division zones and migrate through specific phases. *Neurosci.* **7**, 136-144.
- Nunbhakdi-Chin, V., MacLennan, T., Ogawa, E., Bellotto, D., White, C. and Sontag, E. (2002). Protein phosphatase 2A associates with and regulates atypical PKC and the epithelial tight junction complex. *J. Cell Biol.* **158**, 967-978.
- Ogawa, H., Ohta, N., Morimoto, T. and Matsuzaki, F. (2009). Protein phosphatase 2A negatively regulates aPKC signaling by modulating phosphorylation of Par-6 in *Drosophila* neuroblast asymmetric divisions. *J. Cell Sci.* **122**, 3242-3249.
- Ohno, S. (2000). Intercellular junctions and cellular polarity: the PAR-aPKC complex, a conserved core cassette playing fundamental roles in cell polarity. *Dev. Opin. Cell Biol.* **12**, 648-658.
- Perl, A. K., Wert, S., Nagy, A., Lobe, C. and Whitsett, J. A. (2002). Early restriction of peripheral and proximal cell lineages during formation of the lung. *Proc. Natl. Acad. Sci. USA* **99**, 10482-10487.
- Petersen, P. H., Zou, K., Hwang, J., Jan, Y. and Zhong, W. (2002). Progenitor cell maintenance requires numb and numlike during mouse neurogenesis. *Nature* **419**, 929-934.
- Petersen, P. H., Zou, K., Krauss, S. and Zhong, W. (2004). Continuing role for mouse Numb and numlike in maintaining progenitor cells during cortical neurogenesis. *Neurosci.* **7**, 803-811.
- Qu, J. C., Terrill, M. and Hogan, B. L. (2000). Notch/Delta expression in the developing mouse lung. *Mech. Dev.* **98**, 95-98.
- Rawlins, E. L. (2008). Lung epithelial progenitor cells: lessons from development. *Proc. Am. Thorac. Soc.* **5**, 675-681.
- Rawlins, E. L., Clark, C. P., Xue, Y. and Hogan, B. L. (2009). The Id2+ distal tip of the developing lung contains individual multipotent embryonic progenitor cells. *Development* **136**, 3741-3745.
- Ryu, M. S., Jan, L. Y. and Jan, Y. N. (1994). Asymmetric distribution of numb protein during division of the sensory organ precursor cell confers distinct fates to daughter cells. *Cell* **76**, 477-491.
- Schlosser, G., Awtry, T., Brugmann, S., Jensen, E., Neilson, K., Ruan, G., Ammler, A., Voelker, D., Yan, B., Zhang, C., Klymkowsky, M. and Moody, S. A. (2008). Eya1 and Six1 promote neurogenesis in the cranial placodes in a Sox1-dependent fashion. *Dev. Biol.* **320**, 199-214.
- Shen, Q., Zhong, W., Jan, Y. and Temple, S. (2002). Asymmetric Numb distribution is critical for asymmetric cell division of mouse cerebral cortical stem cells and neuroblasts. *Development* **129**, 4843-4853.
- Shigeoka, A. A., Holscher, T., King, A., Hall, F., Kiosses, W., Tobias, P., Mackman, N., McKay, D. B. (2007). TLR2 is constitutively expressed within the kidney and participates in ischemic renal injury through both MyD88-dependent and -independent pathways. *J. Immunol.* **178**, 6252-6258.
- Siller, K. H. and Doe, C. Q. (2009). Spindle orientation during asymmetric cell division. *Nat. Cell Biol.* **11**, 365-374.
- Smith, C. A., Lau, K., Rahmani, Z., Dho, S., Brothers, G., She, Y., Berry, D., Bonnell, E., Thibault, P., Schweisguth, F. et al. (2007). aPKC-mediated phosphorylation regulates asymmetric membrane localization of the cell fate determinant Numb. *EMBO J.* **26**, 468-480.
- Suzuki, A. and Ohno, S. (2006). The PAR-aPKC system: lessons in polarity. *J. Cell Sci.* **119**, 979-987.
- Tefft, D., Lee, M., Smith, S., Crowe, D., Bellusci, S. and Warburton, D. (2002). mSprout2 inhibits FGF10-activated MAP kinase by differentially binding to upstream target proteins. *Am. J. Physiol. Lung Cell Mol. Physiol.* **283**, L700-L706.
- Tefft, D., De Langhe, S., Del Moral, P., Sala, F., Shi, W., Bellusci, S. and Warburton, D. (2005). A novel function for the protein tyrosine phosphatase Shp2 during lung branching morphogenesis. *Dev. Biol.* **282**, 422-431.
- Tepass, U. (2003). Claudin complexities at the apical junctional complex. *Nat. Cell Biol.* **5**, 595-597.
- Tsao, P. N., Chen, F., Izvolsky, K., Walker, J., Kukuruzinska, M., Lu, J. and Cardoso, W. V. (2008). Gamma-secretase activation of notch signaling regulates the balance of proximal and distal fates in progenitor cells of the developing lung. *J. Biol. Chem.* **283**, 29532-29544.
- Tsao, P. N., Vasconcelos, M., Izvolsky, K., Qian, J., Lu, J. and Cardoso, W. V. (2009). Notch signaling controls the balance of ciliated and secretory cell fates in developing airways. *Development* **136**, 2297-2307.
- Wang, C., Chang, K., Somers, G., Virshup, D., Ang, B., Tang, C., Yu, F. and Wang, H. (2009). Protein phosphatase 2A regulates self-renewal of *Drosophila* neural stem cells. *Development* **136**, 2287-2296.



- Wang, Z., Sandiford, S., Wu, C. and Li, S. S. (2009). Numb regulates cell-cell adhesion and polarity in response to tyrosine kinase signalling. *EMBO J.* **28**, 2360-2373.
- Warburton, D. (2008). Developmental biology: order in the lung. *Nature* **453**, 73-75.
- Warburton, D., Schwarz, M. and Tefft, D., Flores-Delgado, G., Anderson, K. and Cardoso, W. V. (2000). The molecular basis of lung morphogenesis. *Mech. Dev.* **92**, 55-81.
- Xiong, W., Dabbouseh, N. and Rebay, I. (2009). Interactions with the abelson tyrosine kinase reveal compartmentalization of eyes absent function between nucleus and cytoplasm. *Dev. Cell* **16**, 271-279.
- Xu, J., Tian, J., Grumelli, S., Haley, K. and Shapiro, S. D. (2006). Stage-specific effects of cAMP signaling during distal lung epithelial development. *J. Biol. Chem.* **281**, 38894-38904.
- Xu, P. X., Woo, I., Her, H., Beier, D. and Maas, R. (1997a). Mouse Eya homologues of the *Drosophila* eyes absent gene require Pax6 for expression in lens and nasal placode. *Development* **124**, 219-231.
- Xu, P. X., Cheng, J., Epstein, J. and Maas, R. L. (1997b). Mouse Eya genes are expressed during limb tendon development and encode a transcriptional activation function. *Proc. Natl. Acad. Sci. USA* **94**, 11974-11979.
- Xu, P. X., Adams, J., Peters, H., Brown, M., Heaney, S. and Maas, R. (1999). Eya1-deficient mice lack ears and show abnormal apoptosis of organ primordia. *Nat. Genet.* **3**, 113-117.
- Xu, P. X., Zheng, W., Laclef, M., Maire, P., Maas, R., Peters, H. and Xu, X. (2002). Eya1 is required for the morphogenesis of mammalian thymus, parathyroid and thyroid. *Development* **129**, 3033-3044.
- Yang, X., Klein, R., Tian, H., Wang, H. T., Kopan, R. and Shen, J. (2004). Notch activation induces apoptosis of neural precursor cells through a p53-dependent pathway. *Dev. Biol.* **269**, 10-20.
- Zheng, Z., Zhu, H., Fan, Q., Liu, J., Xiao, Z., Berovski, D. and Du, Q. (2010). LGN regulates mitotic spindle orientation during epithelial morphogenesis. *J. Cell Biol.* **189**, 275-283.
- Zou, D., Silvius, J., Fritzsche, B. and Xu, P. X. (2004). Eya1 and Six1 are essential for early steps of sensory neurogenesis in mammalian cranial placodes. *Development* **131**, 5561-5572.
- Zou, D., Erickson, C., Fan, Q., Jin, D., Fritzsche, B. and Xu, P. X. (2008). Eya1 gene dosage critically affects the development of sensory epithelia in the mammalian inner ear. *Hum. Mol. Genet.* **17**, 3340-3356.

RETRACTED
